1 **Liposomes Under Real Cell Conditions Behave Like Real Cells with a Single Pulsed**

2 **Electric Field**

3

4 Gen Urabe,<sup>1\*</sup> Masaharu Shimada,<sup>1</sup> Takumi Ogata,<sup>1</sup> Sunao Katsuki<sup>2</sup>

5

6 <sup>1</sup> Room 306, Kurokami South W2, Graduate School of Science and Technology,

7 Kumamoto University, Kurokami 2-39-1 Chu-o-ku, Kumamoto City, Kumamoto,

8 860-8555, Japan

9 <sup>2</sup> Room 306, Kurokami South W2, Institute of Pulsed Power Science, Kumamoto

10 University, Kurokami 2-39-1 Chu-o-ku, Kumamoto City, Kumamoto 860-8555, Japan

11

12 **\*Corresponding author**

13 Email: [g.urabe@st.cs.kumamoto-u.ac.jp](mailto:g.urabe@st.cs.kumamoto-u.ac.jp)

14

15 **Abstract**

16 Liposomes are widely assumed to present a straightforward physical model of cells.

17 However, almost all previous liposome experiments with pulsed electric fields (PEFs)

18 have been conducted in low-conductivity liquids, a condition that differs significantly

19 from that of cells in medium. Here, we prepared liposomes consisting of soy bean  
20 lecithin and cholesterol, at a molar ratio of 1:1, in higher-conductivity liquid that  
21 approximated the conditions of red blood cells in phosphate-buffered saline, with inner  
22 and outer liquid conductivities of 0.6 and 1.6 S/m, respectively. We found that a single  
23 1.1 kV/cm, 400  $\mu$ s PEF promoted cell-like spontaneous division of liposomes.

24

## 25 **Keywords**

26 Liposome; Vesicle; Pulsed electric field; Conductivity; Real cell condition; Lipid  
27 composition

28

## 29 **Introduction**

30 Bioelectrics, which studies the relationship between electricity and biology, has been  
31 the subject of both basic and applied research of note [1–9]. Electropores induced on  
32 plasma membranes may trigger responses in cells and tissues to pulsed electric fields  
33 (PEFs) [10–17]. Numerous papers have attempted to validate this hypothesis, applying  
34 pulses to liposomes composed of artificial lipid membranes [1,18–20]. However, few  
35 studies have managed to completely mimic the phenomenon in cells. In the case of cells,  
36 plasmid DNA reportedly accumulates on the cell membrane facing the cathode side, and

37 subsequently, actin patches appear on the surface, after which plasmid DNA is taken  
38 into the cells [3,21]. In a study using liposomes, plasmid DNA traversed the lipid  
39 membrane without accumulating [22]. Rols et al. assumed actin as the source of the  
40 difference and suggested conducting a similar experiment using actin-containing  
41 liposomes.

42 Little dye was seen in liposomes without actin, but liposomes with actin proceeded  
43 taking dye more than 146 s, and the latter reaction was similar to those of cells under a  
44 PEF [23]. However, those liposomes were prepared in liquid with much lower  
45 conductivity than is seen in cytoplasm and extracellular liquid (phosphate-buffered  
46 saline [PBS]) [24–27]. Because liquid conductivity influences substance influx through  
47 electropores on cells [28–30] and low-conductivity conditions differ from those of cell  
48 experiments, experiments that approximate real cytoplasm and media will require  
49 adjustment of the conditions. Furthermore, although the liposomes exhibited accurate  
50 lipid molar fractions, it is unlikely that their composition was similar to that of real cell  
51 membranes. As membrane composition can influence reactions to PEFs, liposome  
52 compositions that are closer to those of a real plasma membrane are necessary. To that  
53 end, we adopted an emulsion method that made it possible to adjust the conductivities  
54 of the interior and exterior liquids of the liposomes. We applied PEFs to liposomes with

55 inner- and outer-liquid conductivities comparable to those of red blood cells (0.6 S/m)  
56 and PBS (1.6 S/m) and whose membranes were composed of soybean lecithin and  
57 cholesterol. We adjusted the conductivity of liposomes' inner liquid to that of red blood  
58 cells because their value had already been reported, and most previous simulation  
59 studies preferred this value [31]. Because soybean lecithin is not a purified lipid, but an  
60 extract, we assumed that the composition of soybean lecithin was close to that of real  
61 cell membranes. Although the actual components are uncertain, lecithin is composed  
62 mainly of phosphatidylcholine (PC), which is a main component of cell membranes. We  
63 also applied egg lecithin to the process but were unavailable to produce liposomes.

64

## 65 **Materials and methods**

### 66 **Materials**

67 For liposome preparation, we purchased soy bean lecithin, cholesterol, liquid paraffin,  
68 1,2-dioleoyl-sn-glycero-3-phosphocholine (DOPC), 1- palmitoyl- 2- oleoyl- sn- glycero- 3-  
69 phosphocholine (POPC), chloroform, glucose, and sucrose from Wako and Texas Red-  
70 1,2- dihexadecanoyl- sn- glycero- 3- phosphoethanolamine (DHPE) from Takara. For the  
71 liposome outer liquid, we used PBS(-) (from Wako), and for the liposome inner liquid, we  
72 mixed PBS(-) with 308 mM glucose solution at a 15:26 mL volume ratio. The theoretical

73 osmotic pressure of PBS(-) was 306 mOsm/L. The osmotic pressure of the 308 mM  
74 glucose solution was theoretically 308 mOsm/L. Conductivities of the inner and outer  
75 liquids were 0.64 and 1.64 S/m, respectively. Cholesterol, DOPC, and POPC were  
76 dissolved in chloroform at 180 mM and Tex Red-DHPE at 0.9 mM. All solutions were  
77 stored at a temperature of  $-20^{\circ}\text{C}$ .

78

## 79 **Liposome preparation**

### 80 **Lecithin liposome**

81 Liposome production followed the water-in-oil emulsion method [32]. We estimated the  
82 soy bean lecithin molar weight at 758.06 and then dissolved 0.53 mg of soy lecithin in  
83 500  $\mu\text{L}$  of liquid paraffin at  $80^{\circ}\text{C}$  by vortex (1.4 mM). After storing the sample at a  
84 temperature of  $80^{\circ}\text{C}$  for 10 min with the cap of the microtube left open, we added 50  $\mu\text{L}$   
85 of the inner liquid and vortexed it for 10 s and then immediately put the sample on ice  
86 for 10 min to stabilize the emulsions. Next, 400  $\mu\text{L}$  of the emulsion solution was put on  
87 400  $\mu\text{L}$  of the outer liquid, which had been on ice. The volume ratio of the emulsion  
88 solution and the outer liquid was 400:400. After treating the sample under  
89 centrifugation at 18,000  $g$  and a temperature of  $4^{\circ}\text{C}$  for 5 min, we disposed of as much of  
90 the supernatant as possible and extracted the sediments, which was the aggregation of

91 liposomes.

92

### 93 **Lecithin-cholesterol liposomes and fluorescent liposomes**

94 To produce cholesterol-containing lecithin liposomes (at a molar ratio of  
95 lecithin/cholesterol = 1:1 ), we added 4  $\mu$ L of cholesterol solution to a heated liquid  
96 paraffin-lecithin solution at a temperature of 80°C and then mixed them by vortex to  
97 adjust the cholesterol concentration to 1.4 mM. For a lecithin/cholesterol molar ratio of  
98 1:1.5 and 2:1 liposomes, the amounts of added cholesterol solution were 6 and 2  $\mu$ L. For  
99 fluorescent labeling, 2  $\mu$ L of Tex Red-DHPE was added simultaneously to make a final  
100 concentration of 3.6  $\mu$ M (with a molar ratio of 0.13 mol%). The sample was stored at a  
101 temperature of 80°C for 10 min with the cap of the microtube left open, and the rest of  
102 the protocol was the same as that of lecithin liposome.

103

### 104 **DOPC liposomes and POPC liposomes**

105 To produce DOPC liposomes, DOPC and cholesterol liquids were mixed in 500  $\mu$ L of  
106 liquid paraffin at the following ratios: 4:0 for DOPC-only liposomes, 4:4 for  
107 DOPC/cholesterol = 1:1 (molar ratio), 2:4 for DOPC/cholesterol = 1:2 (molar ratio), and  
108 2:6 for DOPC/cholesterol = 1:3 (molar ratio). In the case of POPC, the POPC and

109 cholesterol liquids were mixed at the following ratios; 4:0 for POPC-only liposomes and  
110 4:4 for POPC/cholesterol = 1:1 (molar ratio). The sample was stored at a temperature of  
111 80°C for 10 min with the cap of the microtube left open, and the rest of the protocol was  
112 the same as that of lecithin liposome

113

#### 114 **Calcium-ion influx detection**

115 *The same osmotic pressure between inner and outer liquid*

116 First, 50 µg of Fluo-8(R) sodium salt (Cosmo Bio) was dissolved in 62.5 µL of Milli-Q,  
117 and 1 µL of the solution was diluted in 50 µL of the inner liquid for a final Fluo-8  
118 concentration of 20 µM. For the calcium-ion flow experiment, liposomes were prepared  
119 with the Fluo-8-containing inner liquid. After preparing the liposome sample, a solution  
120 of D-PBS(+) preparation with a Ca and Mg reagent solution 100× (Nacalai Tesque) was  
121 added at 1 % (v/v) to mix the calcium ions in the outer liquid.

122

123 *Different osmotic pressures between inner and outer liquid*

124 To strengthen calcium influx, we set the outer-liquid osmotic pressure at half of that of  
125 the inner liquid. The inner-liquid composition was the same as that used to test Ca-ion  
126 influx, but in the case of the outer liquid, the PBS (-) was diluted twice with Milli-Q. The

127 rest of the protocol was the same as that of no osmotic pressure difference.

128

### 129 **PEF application system and microscopy**

130 We used two slices of a platinum plate, which are 0.2-mm thick and 2.7-mm wide, as  
131 electrodes. The electrodes were fixed with a 640- $\mu$ m gap on a glass slide and connected  
132 to the PEF generator. We set the glass slide–electrode device on a fluorescent  
133 microscope (Leica, DMI8) combined with a digital camera (Canon, EOS 8000D). Movies  
134 were recorded at 67 frames per second. The details of microscopy are provided in a  
135 previous paper [33].

136

### 137 **Results**

138 We referred to HeLa cells, which were familiar to us, for the lipid molar ratio of cell  
139 membranes, facilitating a comparison of liposome and cell results. As PC and  
140 cholesterol constitute primarily of HeLa cell membranes, their molar ratio was 1:1, and  
141 other lipids represented only minor parts [34,35], we mixed lecithin and cholesterol at a  
142 molar proportion of 1:1.

143

### 144 **Liposomes divided spontaneously**



145 When we applied a single 1.1 kV/cm, 400  $\mu$ s PEF to the liposomes, the liposomes  
146 divided spontaneously (Fig. 1A, B, and C). To determine the optimal PEF condition to  
147 induce division, we scanned the pulse duration and electric field intensity, showing that  
148 a 400 or 500  $\mu$ s, 1.1 kV/cm PEF appeared to have the potential to induce division (Table.  
149 1). A PEF with identical energy but a shorter pulse did not promote self-division (Table.  
150 2). Because a single 1.1 kV/cm, 400  $\mu$ s PEF can theoretically increase the PBS  
151 temperature by 2°C, the thermal influence may be small. These results suggest that  
152 energy was not an important factor in the division.

153

154 Here Fig. 1.

155 Here Table. 1

156 Here Table. 2

157

### 158 **Do cholesterol and lecithin have division ability?**

159 As liposomes without cholesterol did not divide, it is possible that cholesterol has the  
160 potential to induce division. Varying the molar ratios of cholesterol, liposomes with  
161 more than 50% of cholesterol divided (Fig. 2A, B, C, and D).

162

163 Here Fig. 2.

164

165 PC is a main component of lecithin. Previous studies have used DOPC, POPC, and

166 1,2-dipalmitoyl-sn-glycero-3-phosphocholine (DPPC), all of which are classified as PC.

167 To evaluating which elements contributed to the liposome division, we prepared the

168 liposomes, with each lipid and cholesterol at a 1:1 molar proportion. DOPC produced

169 lecithin-like liposomes, but POPC did not (Fig. 3). Because POPC had higher phase

170 transition temperature than DOPC and temperature influences liposome production

171 [36], we anticipated that the surface aggregation on POPC liposomes may be aggregates

172 of gel-phase POPC. We did not prepare DPPC liposomes because DPPC has a much

173 higher phase transition temperature, making it unlikely for DPPC liposomes to produce

174 lecithin-like liposomes. No division occurred in DOPC liposomes, which most likely

175 resembled lecithin liposomes (Fig. 3A), even though the cholesterol fraction increased

176 by more than 50% (Fig. 3B and C). These results suggest that several lipids together

177 induced division, rather than only one element of phospholipids contributing to the

178 division.

179

180 Here Fig. 3.

181

182 **Conductivity of liquids related to the division**

183 When we lowered the conductivity of both inner and outer liquids to 105  $\mu\text{S/m}$ , no  
184 division occurred (lecithin/cholesterol = 1:1) (Table. 3). Because the emulsion method  
185 required heavier inner liquids than outer liquids, we mixed glucose solution and PBS (-)  
186 for the inner liquid to ensure that inner conductivity decreased to 0.6 S/m. For the same  
187 reason, we did not execute the experiments with 1.6 S/m inner liquid. Instead, 0.6 S/m  
188 for the inner liquid and 1.6 S/m for the outer liquid (the same as for the red blood cells in  
189 PBS) were deemed appropriate.

190

191 Here Table. 3.

192

193 **Ca-ion influx had little relation to division**

194 To analyze ion influx under the PEF that induced the liposome division, we attempted  
195 to observe Ca-ion influx into liposomes. However, we detected no Ca-ion flow into  
196 liposomes after a single PEF (Fig. 4). Lecithin liposomes, the surfaces of which are not  
197 smooth, collapsed immediately after PEF exposure (Supplementary Fig. 1A). When the  
198 liposomes disintegrated, green fluorescence emerged from the outside of the liposomes,

199 indicating that Fluo-8 in the liposomes had seeped to the surroundings and connected to  
200 Ca ions (Supplementary Fig. 1B). This proved that our method could detect Ca-ion  
201 influx. Because a Ca ion is much smaller than dyes such as propidium iodide, Ca ions  
202 are prone to flowing across lipid membranes faster than dyes [37]. Our failure to detect  
203 a Ca influx indicated that the extent of liquid flow accompanied by the single 1.1 kV/cm,  
204 400  $\mu$ s PEF was small.

205

206 Here Fig. 4.

207

#### 208 **Endocytosis-like phenomena are also induced**

209 Lecithin-cholesterol liposomes sometimes showed that lipid patches were detached from  
210 the membrane surface as in endocytosis (Fig. 5A). Additionally, lipids aggregated on the  
211 membrane just after PEF application (Fig. 5B). However, on DOPC-cholesterol  
212 liposomes, which did not have division ability, lipid aggregation and patch uptake did  
213 not occur (Fig. 5 C, D).

214

215 Here Fig. 5.

216

217 **Discussion**

218 **Why did liposomes divide?**

219 Why current conditions trigger liposome division and endocytosis-like behavior  
220 remains unknown. Previous studies have reported that electrofusion of liposomes  
221 promotes spontaneous liposome division, explaining the phenomenon in terms of  
222 thermodynamics; as the amount of lipid per liposome increased by electrofusion, the  
223 system became unstable, and consequently, liposomes divided to increase entropy and  
224 stabilize the system [38,39]. In our case, however, electrofusion did not precede division,  
225 so the previous theory did not explain our results. Because liposome division  
226 accompanied liposome deformation, it seemed possible to describe the phenomenon in  
227 terms of liposome volume change, but the influence of volume change is likely small  
228 because the osmotic pressures of the inner and outer liquids were almost identical. In  
229 fact, calcium-ion influx was too small to detect.

230 In addition, we have no reasonable explanation on why liposome divisions did not  
231 occur in previous studies. However, our study with less-conductive inner and outer  
232 liquids suggests that liquid conductivity is one of the determining factors. Indeed, one  
233 paper using buffered solution as an electroformation buffer showed vesicle budding  
234 without releasing daughter vesicle [40].

235

236 **Membrane conditions may be related to liposome division**

237 We increased Ca-ion influx by reducing the osmotic pressure of the outer liquid  
238 compared with the inner liquid. Using 154 mM glucose solution with a conductivity of  
239 0.7 S/m and a theoretical osmotic pressure of 154 mOsm/L as the outer liquid and  
240 PBS(-)-glucose solution with a conductivity of 0.6 S/m and a theoretical osmotic  
241 pressure of 308 mOsm/L as the inner liquid, Ca-ion influx was not detected in lecithin  
242 liposomes (Supplementary Fig. 2A and B), whereas lecithin-cholesterol liposomes  
243 disintegrated with Ca-ion influx (Supplementary Fig. 2C and D). These tendencies  
244 coincided with those of previous studies that revealed that liposomes, including charged  
245 lipids, such as cholesterol and POPG, were likely to collapse more easily due to PEF  
246 exposure compared with those without charged lipids [41,42]. This prompted the  
247 question of whether charged lipids can trigger liposome division. We therefore examined  
248 the behavior of lecithin-POPG liposomes and lecithin-POPC liposomes. POPG has a  
249 negative charge, whereas POPC does not, but both have similar hydrophobic backbones  
250 with one saturated and one unsaturated fatty acid chain. Both POPG-containing  
251 liposomes and POPC-containing liposomes divided (Supplementary Fig. 2E and F). This  
252 suggested that it is not lipid charge but membrane condition that induces liposome

253 division. In fact, Riske et al. reported changes in lipid composition in a plasma  
254 membrane during mitosis [43]. Determining which type of lipid can induce liposome  
255 division with lecithin should be subjected to a screening wand, and we intend to follow  
256 this line of inquiry in the future.

257

### 258 **Future tasks**

259 There are several important points to examine in the future: the relationship between  
260 PEF conditions and the time lag from PEF application to division or endocytosis, the  
261 influence of inner-liquid viscosity, the relationship between PEF conditions and the size  
262 of mother liposomes and that of daughter liposomes, PEF direction and division or  
263 endocytosis polarities, and how membrane composition or conditions affect the division.

264

### 265 **Acknowledgments**

266 This study was partially supported by a Grant-in-Aid for Scientific Research  
267 (17H03220). The authors would like to thank Enago ([www.enago.jp](http://www.enago.jp)) for the English  
268 language review.

269

### 270 **Author contributions**

271 G.U, M.S, and T.O contributed to the experiments. S.K supervised and managed this  
272 project.

273

## 274 **References**

275 [1] D.L. Perrier, L. Rems, P.E. Boukany, Lipid vesicles in pulsed electric fields:  
276 Fundamental principles of the membrane response and its biomedical applications,  
277 Adv. Colloid Interface Sci. 249 (2017) 248–271. doi:10.1016/j.cis.2017.04.016.

278 [2] Z.A. Levine, P.T. Vernier, Life cycle of an electropore: Field-dependent and  
279 field-independent steps in pore creation and annihilation, J. Membr. Biol. 236 (2010)  
280 27–36. doi:10.1007/s00232-010-9277-y.

281 [3] D. Miklavcic, M.-P. Rols, S. Haberl Meglic, C. Rosazza, A. Zumbusch, Gene  
282 Electrotransfer: A Mechanistic Perspective, Curr. Gene Ther. 16 (2016) 98–129.  
283 doi:10.2174/1566523216666160331130040.

284 [4] L. Rems, D. Miklavčič, Tutorial: Electroporation of cells in complex materials and  
285 tissue, J. Appl. Phys. 119 (2016) 201101. doi:10.1063/1.4949264.

286 [5] K. Heileman, J. Daoud, M. Tabrizian, Dielectric spectroscopy as a viable biosensing  
287 tool for cell and tissue characterization and analysis, Biosens. Bioelectron. 49 (2013)  
288 348–359. doi:10.1016/j.bios.2013.04.017.



- 289 [6] S. Sundelacruz, M. Levin, D.L. Kaplan, Role of membrane potential in the regulation  
290 of cell proliferation and differentiation, *Stem Cell Rev. Reports.* 5 (2009) 231–246.  
291 doi:10.1007/s12015-009-9080-2.
- 292 [7] S.N. Iwasa, R. Babona-Pilipos, C.M. Morshead, Environmental Factors That  
293 Influence Stem Cell Migration: An “Electric Field,” (2017). doi:10.1155/2017/4276927.
- 294 [8] F. Chang, N. Minc, Electrochemical Control of Cell and Tissue Polarity, *Annu. Rev.*  
295 *Cell Dev. Biol.* 30 (2014) 317–336. doi:10.1146/annurev-cellbio-100913-013357.
- 296 [9] K.R. Robinson, The responses of cells to electrical fields: A review, *J. Cell Biol.* 101  
297 (1985) 2023–2027. doi:10.1083/jcb.101.6.2023.
- 298 [10] M.P. Stewart, R. Langer, K.F. Jensen, Intracellular delivery by membrane  
299 disruption: Mechanisms, strategies, and concepts, *Chem. Rev.* 118 (2018) 7409–7531.  
300 doi:10.1021/acs.chemrev.7b00678.
- 301 [11] J.L. Guerriero, D. Ditsworth, Y. Fan, F. Zhao, H.C. Crawford, W.X. Zong,  
302 Chemotherapy induces tumor clearance independent of apoptosis, *Cancer Res.* 68  
303 (2008) 9595–9600. doi:10.1158/0008-5472.CAN-08-2452.
- 304 [12] S.K. Frandsen, M.B. Krüger, U.M. Mangalanathan, T. Tramm, F. Mahmood, I.  
305 Novak, J. Gehl, Normal and malignant cells exhibit differential responses to calcium  
306 electroporation, *Cancer Res.* 77 (2017) 4389–4401.

- 307 doi:10.1158/0008-5472.CAN-16-1611.
- 308 [13] T.B. Napotnik, M. Reberšek, T. Kotnik, E. Lebrasseur, G. Cabodevila, D. Miklavčič,  
309 Electropermeabilization of endocytotic vesicles in B16 F1 mouse melanoma cells, *Med.*  
310 *Biol. Eng. Comput.* 48 (2010) 407–413. doi:10.1007/s11517-010-0599-9.
- 311 [14] M. Leguèbe, A. Silve, L.M. Mir, C. Pognard, Conducting and permeable states of cell  
312 membrane submitted to high voltage pulses: Mathematical and numerical studies  
313 validated by the experiments, *J. Theor. Biol.* (2014). doi:10.1016/j.jtbi.2014.06.027.
- 314 [15] E.E. Vaughan, D.A. Dean, Intracellular trafficking of plasmids during transfection is  
315 mediated by microtubules, *Mol. Ther.* 13 (2006) 422–428.  
316 doi:10.1016/j.ymthe.2005.10.004.
- 317 [16] E.B. Sözer, Z.A. Levine, P.T. Vernier, Quantitative limits on small molecule transport  
318 via the electropermeome measuring and modeling single nanosecond perturbations,  
319 *Sci. Rep.* (2017). doi:10.1038/s41598-017-00092-0.
- 320 [17] D. Voyer, A. Silve, L.M. Mir, R. Scorretti, C. Pognard, Dynamical modeling of tissue  
321 electroporation, *Bioelectrochemistry.* 119 (2018) 98–110.  
322 doi:10.1016/j.bioelechem.2017.08.007.
- 323 [18] T. Batista Napotnik, G. Bello, E.K. Sinner, D. Miklavčič, The Effect of Nanosecond,  
324 High-Voltage Electric Pulses on the Shape and Permeability of Polymersome GUVs,

- 325 J. Membr. Biol. 250 (2017) 441–453. doi:10.1007/s00232-017-9968-8.
- 326 [19] E. Karatekin, O. Sandre, H. Guitouni, N. Borghi, P.H. Puech, F. Brochard-Wyart,  
327 Cascades of transient pores in giant vesicles: Line tension and transport, Biophys. J.  
328 84 (2003) 1734–1749. doi:10.1016/S0006-3495(03)74981-9.
- 329 [20] R. Dimova, K.A. Riske, S. Aranda, N. Bezlyepkina, R.L. Knorr, R. Lipowsky, Giant  
330 vesicles in electric fields, Soft Matter. 3 (2007) 817–827. doi:10.1039/b703580b.
- 331 [21] C. Rosazza, H. Deschout, A. Buntz, K. Braeckmans, M.P. Rols, A. Zumbusch,  
332 Endocytosis and Endosomal Trafficking of DNA After Gene Electrotransfer In Vitro,  
333 Mol. Ther. - Nucleic Acids. (2016). doi:10.1038/mtna.2015.59.
- 334 [22] T. Portet, C. Favard, J. Teissié, D.S. Dean, M.P. Rols, Insights into the mechanisms  
335 of electromediated gene delivery and application to the loading of giant vesicles with  
336 negatively charged macromolecules, Soft Matter. 7 (2011) 3872–3881.  
337 doi:10.1039/c0sm01389g.
- 338 [23] D.L. Perrier, A. Vahid, V. Kathavi, L. Stam, L. Rems, Y. Mulla, A. Muralidharan,  
339 G.H. Koenderink, M.T. Kreutzer, P.E. Boukany, Response of an actin network in  
340 vesicles under electric pulses, Sci. Rep. 9 (2019) 8151.  
341 doi:10.1038/s41598-019-44613-5.
- 342 [24] M. Barthmes, J. Liao, Y. Jiang, A. Brüggemann, C. Wahl-Schott, Electrophysiological

- 343 characterization of the archaeal transporter NCX\_Mj using solid supported  
344 membrane technology, *J. Gen. Physiol.* 147 (2016) 485–496.  
345 doi:10.1085/jgp.201611587.
- 346 [25] E.M. Schmid, D.L. Richmond, D.A. Fletcher, Reconstitution of proteins on  
347 electroformed giant unilamellar vesicles, Elsevier Ltd, 2015.  
348 doi:10.1016/bs.mcb.2015.02.004.
- 349 [26] W. Li, Q. Wang, Z. Yang, W. Wang, Y. Cao, N. Hu, H. Luo, Y. Liao, J. Yang, Impacts  
350 of electrical parameters on the electroformation of giant vesicles on ITO glass chips,  
351 *Colloids Surfaces B Biointerfaces.* 140 (2016) 560–566.  
352 doi:10.1016/j.colsurfb.2015.11.020.
- 353 [27] D.J. Estes, M. Mayer, Giant liposomes in physiological buffer using electroformation  
354 in a flow chamber, *Biochim. Biophys. Acta - Biomembr.* 1712 (2005) 152–160.  
355 doi:10.1016/j.bbamem.2005.03.012.
- 356 [28] J. Dermol, O.N. Pakhomova, A.G. Pakhomov, D. Miklavěič, Cell electrosensitization  
357 exists only in certain electroporation buffers, *PLoS One.* 11 (2016).  
358 doi:10.1371/journal.pone.0159434.
- 359 [29] K.J. Müller, V.L. Sukhorukov, U. Zimmermann, Reversible electropermeabilization  
360 of mammalian cells by high-intensity, ultra-short pulses of submicrosecond duration,

- 361 J. Membr. Biol. 184 (2001) 161–170. doi:10.1007/s00232-001-0084-3.
- 362 [30] J. Li, W. Tan, M. Yu, H. Lin, The effect of extracellular conductivity on  
363 electroporation-mediated molecular delivery, *Biochim. Biophys. Acta - Biomembr.*  
364 1828 (2013) 461–470. doi:10.1016/j.bbamem.2012.08.014.
- 365 [31] A. Ivorra, Tissue Electroporation as a Bioelectric Phenomenon: Basic Concepts, in:  
366 2010: pp. 23–61. doi:10.1007/978-3-642-05420-4\_2.
- 367 [32] K. Nishimura, T. Hosoi, T. Sunami, T. Toyota, M. Fujinami, K. Oguma, T. Matsuura,  
368 H. Suzuki, T. Yomo, Population analysis of structural properties of giant liposomes  
369 by flow cytometry, *Langmuir*. 25 (2009) 10439–10443. doi:10.1021/la902237y.
- 370 [33] N. Ohnishi, Y. Fujiwara, T. Kamezaki, S. Katsuki, Variations of Intracellular Ca<sup>2+</sup>  
371 Mobilization Initiated by Nanosecond and Microsecond Electrical Pulses in HeLa  
372 Cells, *IEEE Trans. Biomed. Eng.* 66 (2019) 2259–2268.  
373 doi:10.1109/TBME.2018.2886602.
- 374 [34] D.B. Weinstein, J.B. Marsh, M.C. Glick, L. Warren, Membranes of animal cells. IV.  
375 Lipids of the L cell and its surface membrane., *J. Biol. Chem.* 244 (1969) 4103–11.  
376 <http://www.jbc.org/content/244/15/4103>.
- 377 [35] H.B. Bosmann, A. Hagopian, E.H. Eylar, Cellular membranes: The isolation and  
378 characterization of the plasma and smooth membranes of hela cells, *Arch. Biochem.*

- 379 Biophys. 128 (1968) 51–69. doi:10.1016/0003-9861(68)90008-8.
- 380 [36] Q. Li, X. Wang, S. Ma, Y. Zhang, X. Han, Electroformation of giant unilamellar  
381 vesicles in saline solution, *Colloids Surfaces B Biointerfaces*. 147 (2016) 368–375.  
382 doi:10.1016/j.colsurfb.2016.08.018.
- 383 [37] B.L. Ibey, J.C. Ullery, O.N. Pakhomova, C.C. Roth, I. Semenov, H.T. Beier, M.  
384 Tarango, S. Xiao, K.H. Schoenbach, A.G. Pakhomov, Bipolar nanosecond electric  
385 pulses are less efficient at electroporation and killing cells than monopolar  
386 pulses, *Biochem. Biophys. Res. Commun.* 443 (2014) 568–573.  
387 doi:10.1016/j.bbrc.2013.12.004.
- 388 [38] H. Shiomi, S. Tsuda, H. Suzuki, T. Yomo, Liposome-based liquid handling platform  
389 featuring addition, mixing, and aliquoting of femtoliter volumes, *PLoS One*. 9 (2014)  
390 5–10. doi:10.1371/journal.pone.0101820.
- 391 [39] H. Suzuki, T. Yomo, T. Matsuura, H. Terasawa, K. Nishimura, Coupling of the fusion  
392 and budding of giant phospholipid vesicles containing macromolecules, *Proc. Natl.*  
393 *Acad. Sci.* 109 (2012) 5942–5947. doi:10.1073/pnas.1120327109.
- 394 [40] K.A. Riske, R.L. Knorr, R. Dimova, Bursting of charged multicomponent vesicles  
395 subjected to electric pulses, *Soft Matter*. 5 (2009) 1983–1986. doi:10.1039/b900548j.
- 396 [41] T. Portet, R. Dimova, A new method for measuring edge tensions and stability of lipid

397 bilayers: Effect of membrane composition, *Biophys. J.* 99 (2010) 3264–3273.

398 doi:10.1016/j.bpj.2010.09.032.

399 [42] R. Dimova, N. Bezlyepkina, M.D. Jordö, R.L. Knorr, K.A. Riske, M. Staykova, P.M.

400 Vlahovska, T. Yamamoto, P. Yang, R. Lipowsky, Vesicles in electric fields: Some

401 novel aspects of membrane behavior, *Soft Matter.* 5 (2009) 3201–3212.

402 doi:10.1039/b901963d.

403 [43] S. Furse, G.C. Shearman, Do lipids shape the eukaryotic cell cycle?, *Biochim. Biophys.*

404 *Acta - Mol. Cell Biol. Lipids.* 1863 (2018) 9–19. doi:10.1016/j.bbalip.2017.09.010.

405

406

407

408

409

410

411

412

413

414

415 **Figures**

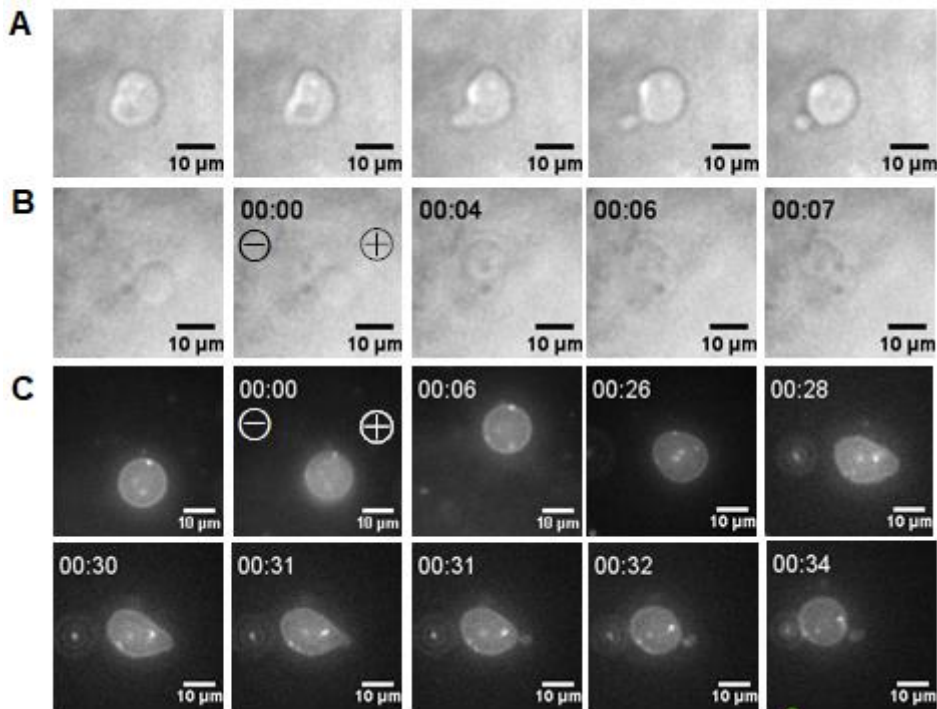

416  
417 **Figure 1.** A) Spontaneous liposome divisions and PEF conditions. B)  
418 Lecithin/cholesterol = 1:1 (molar ratio) liposomes divided spontaneously after a 1.1  
419 kV/cm, 400  $\mu$ s single PEF application. As we did not measure the time, there is no time  
420 display in series A. All time displays are in seconds. “00:00” = timing of PEF application.  
421 C. Liposomes with lecithin/cholesterol/texas red-DHPE = 1.4:1.4:0.0036 mM.  $\oplus$  = the  
422 anode side of the electrode;  $\ominus$  = the cathode side of the electrode.



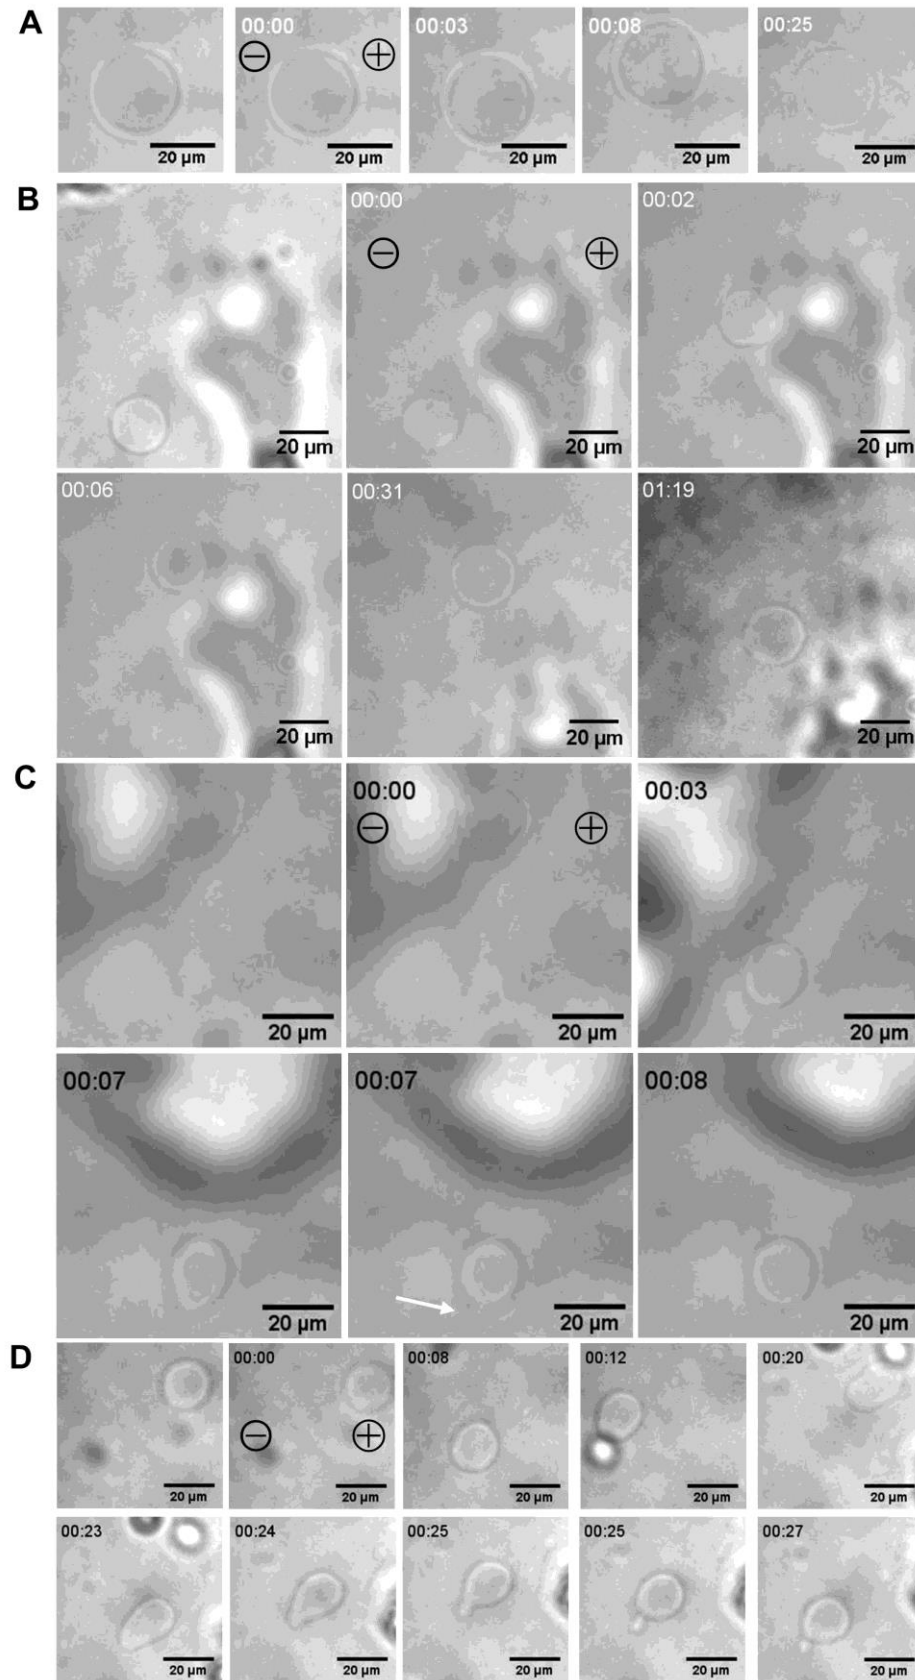

424 **Figure 2.** Reactions of several liposome types with 1.1 kV/cm, 400  $\mu$ s single PEF. A)  
425 Lecithin-only liposomes did not divide. B) Lecithin/cholesterol = 2:1 (molar ratio)  
426 liposomes did not divide. C) Lecithin/cholesterol = 1:1 (molar ratio) liposomes budded  
427 daughter liposomes. The white arrow indicates the budding position. (D)  
428 Lecithin/cholesterol = 1:1.5 (molar ratio) budded daughter liposomes. All time displays  
429 are in seconds. “00:00” = timing of PEF application.  $\oplus$  = the anode side of the electrode;  
430  $\ominus$  = the cathode side of the electrode.

431

432

433

434

435

436

437

438

439

440

441

442

443

444

445

446

447

448

449

450

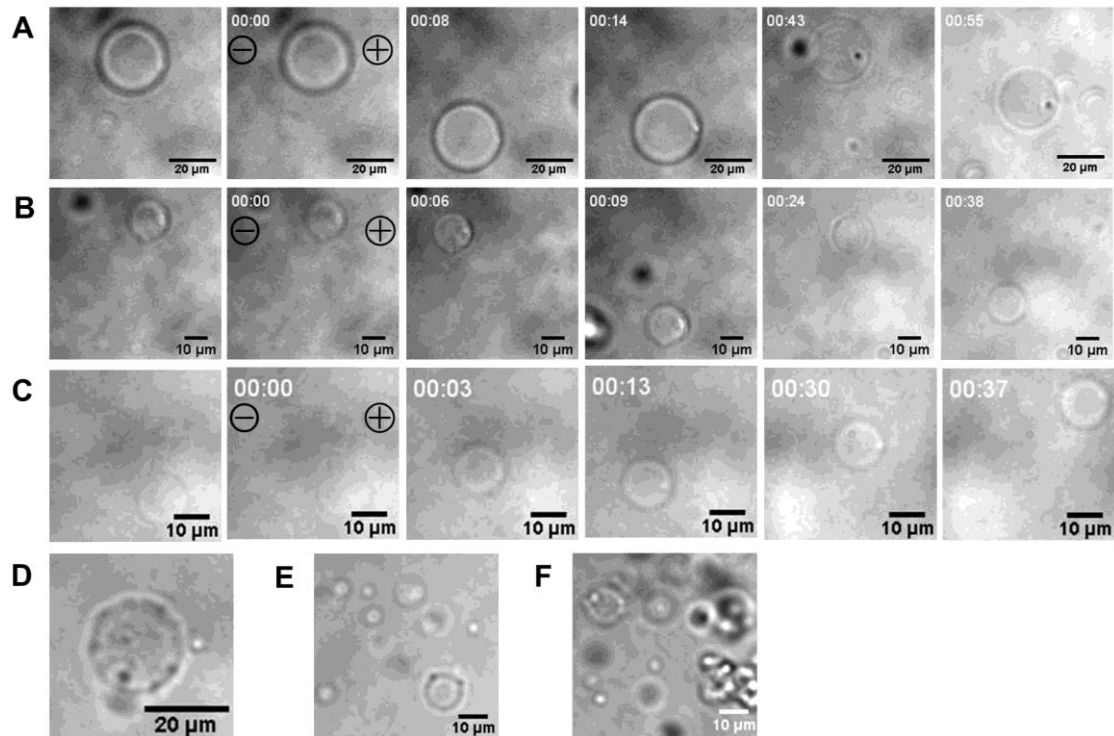

451

452 **Figure 3.** Liposomes without lecithin did not exhibit division. PEF was 1.1 kV/cm, 400  
453  $\mu$ s single pulse. A) DOPC/cholesterol = 1: 1 (molar ratio). B) DOPC/cholesterol =1:2  
454 (molar ratio). C) DOPC/cholesterol = 1:3 (molar ratio). D) POPC-only liposome. E and F)  
455 POPC/cholesterol = 1:1 (molar ratio). All time displays are in seconds. “00:00” = timing  
456 of PEF application.  $\oplus$  = the anode side of the electrode;  $\ominus$  = the cathode side of the  
457 electrode.

458

459

460

461

462

463

464

465

466

467

468

469

470

471

472

473

474

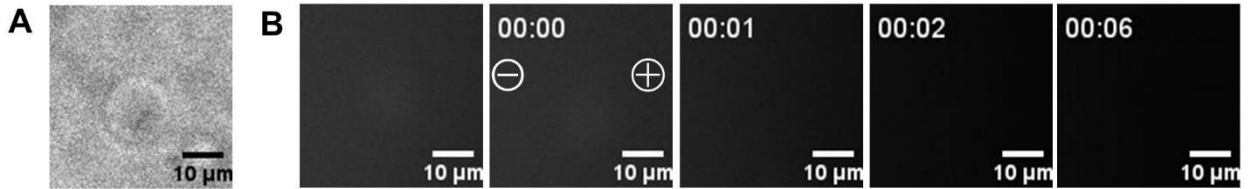

475

476

477

478

479

480

481

482

483

484

485

486

487

488

489

490

491

492

493

494

495

496

497

498

499

500

501

502

503

504

**Figure 4.** Calcium ion influx was not detected in lecithin/cholesterol = 1:1 (molar ratio) liposomes with 1.1 kV/cm, 400 μs single PEF. A) Bright-field photo of liposomes before PEF application. B) Fluorescent photos of liposomes with a GFP filter. There was no signal after pulse application. All time displays are in seconds. “00:00” = timing of PEF application. ⊕ =the anode side of the electrode; ⊖ = the cathode side of the electrode.

505

506

507

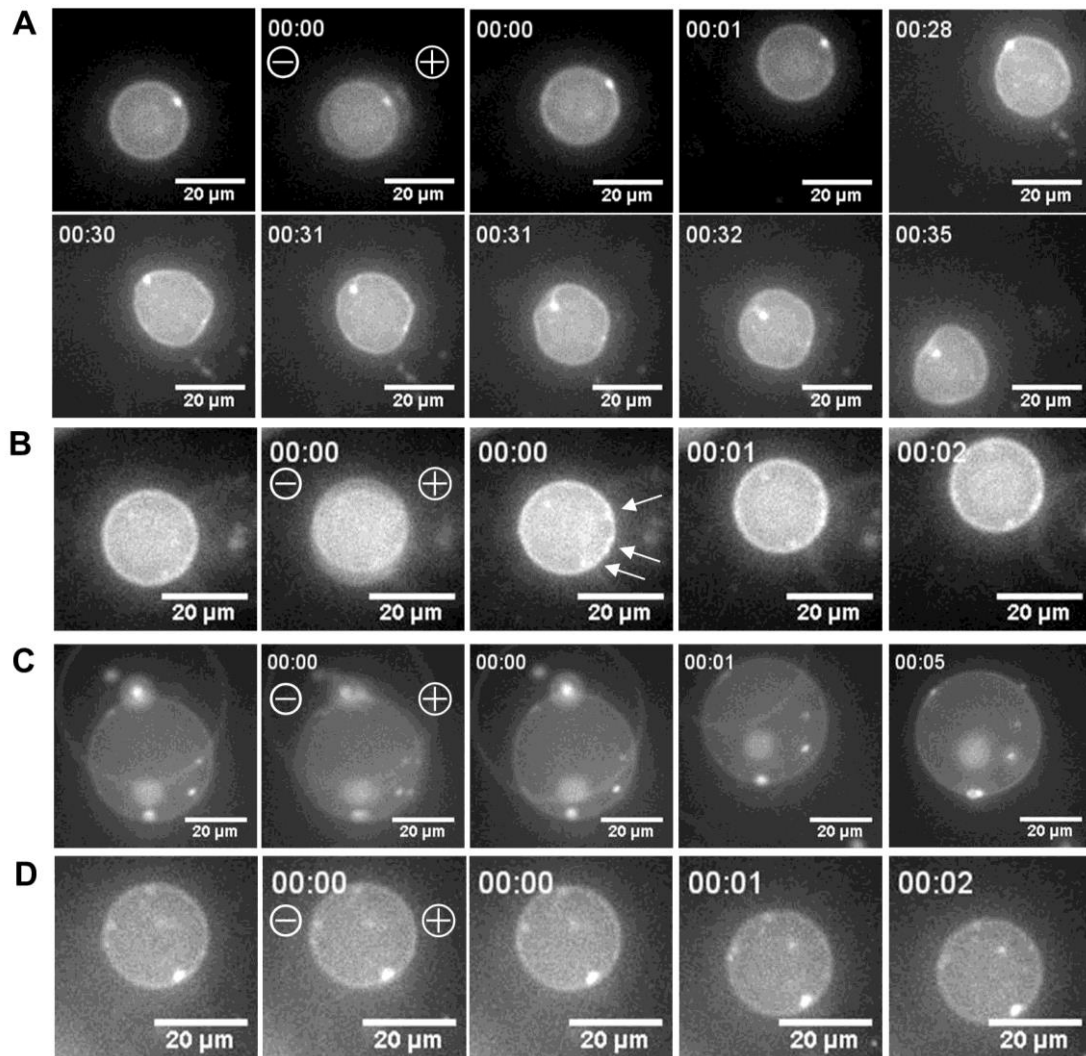

508

509 **Figure 5.** (A) Lecithin/cholesterol = 1:1 (molar ratio) liposomes sometimes exhibited  
510 endocytosis-like behavior after a single 1.1 kV/cm, 400 μs PEF application. (B)  
511 Lecithin/cholesterol = 1:1:1 (molar ratio) liposomes showed patch-like aggregation of  
512 lipids on the membrane just after PEF application. White arrows indicate aggregated  
513 points. (C and D) DOPC/cholesterol = 1:1 (molar ratio) liposomes did not show patch-like  
514 aggregation of lipids on the membrane. All time displays are in seconds. “00:00” =  
515 timing of PEF application. ⊕ = the anode side of the electrode; ⊖ = the cathode side of  
516 the electrode.

517

518

519 **Tables**

520 **Table 1.** Various PEF duration vs. whether the liposome division happened. Electric  
 521 field was 1.1 kV/cm.

| Pulse duration / us | Division |
|---------------------|----------|
| 100                 | ×        |
| 200                 | ×        |
| 300                 | △        |
| 400                 | ○        |
| 500                 | ○        |

522 ○ = liposome division occurred almost every time; △ = division occurred some of the  
 523 time; × = division did not occur.

524

525

526 **Table 2.** Two different PEF conditions with the same energy of 1.1 kV/cm PEF (400 μs).  
 527 Both conditions did not trigger liposome division.

| Electric field (kV/cm) | Pulse duration (μs) | Division   |
|------------------------|---------------------|------------|
| 6.9                    | 10                  | ×          |
| 21.9                   | 1                   | Discharged |

528 × indicates no liposome division

529

530

531 **Table 3.** Several conductivity patterns of inner and outer liquids. PEF was 1.1 kV/cm  
 532 (400 μs).  $\sigma_{ex}$  is the conductivity of the outer liquid, whereas  $\sigma_{in}$  is the conductivity of the  
 533 inner liquid.

| Condition                                                        | Division |
|------------------------------------------------------------------|----------|
| $\sigma_{ex} = 1.6 \text{ S/m}, \sigma_{in} = 0.6 \text{ S/m}$   | ○        |
| $\sigma_{ex} = 105 \text{ μS/m}, \sigma_{in} = 0.6 \text{ S/m}$  | ×        |
| $\sigma_{ex} = 1.6 \text{ S/m}, \sigma_{in} = 105 \text{ μS/m}$  | ×        |
| $\sigma_{ex} = 105 \text{ μS/m}, \sigma_{in} = 105 \text{ μS/m}$ | ×        |

534 ○ indicates liposome division and × indicates no liposome division. For  $\sigma_{in} = 105 \text{ μS/m}$ ,  
 535 we used sucrose solution and for  $\sigma_{ex} = 105 \text{ μS/m}$ , we used glucose solution.

536

537

538

539

540



541 **Supplementary Figures**

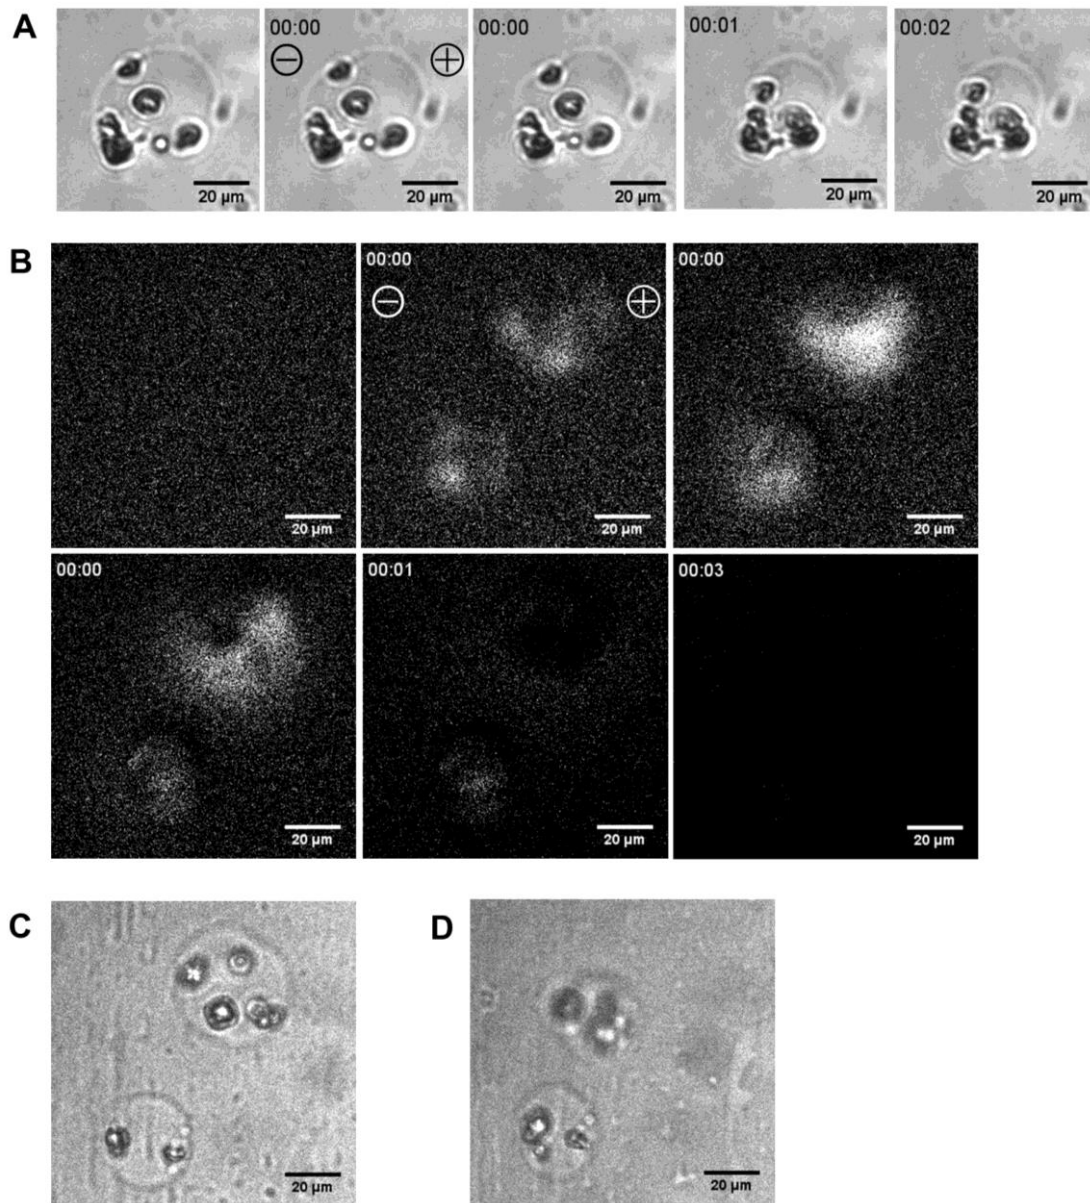

542

543 **Supplementary Figure 1.** A) Lecithin/cholesterol = 1:1 (molar ratio) liposomes with a  
544 rough membrane surface collapsed just after application of a single 1.1 kV/cm, 400 μs  
545 PEF. B) Just after integration of lecithin/cholesterol = 1:1 (molar ratio) liposomes, a  
546 fluorescent signal emerged within 1 s. C) Bright-field photo of the liposomes before PEF  
547 application. D) Bright-field photo of the liposomes after PEF application. All time  
548 displays are in seconds. “00:00” = timing of PEF application. ⊕ = the anode side of the  
549 electrode; ⊖ = the cathode side of the electrode.

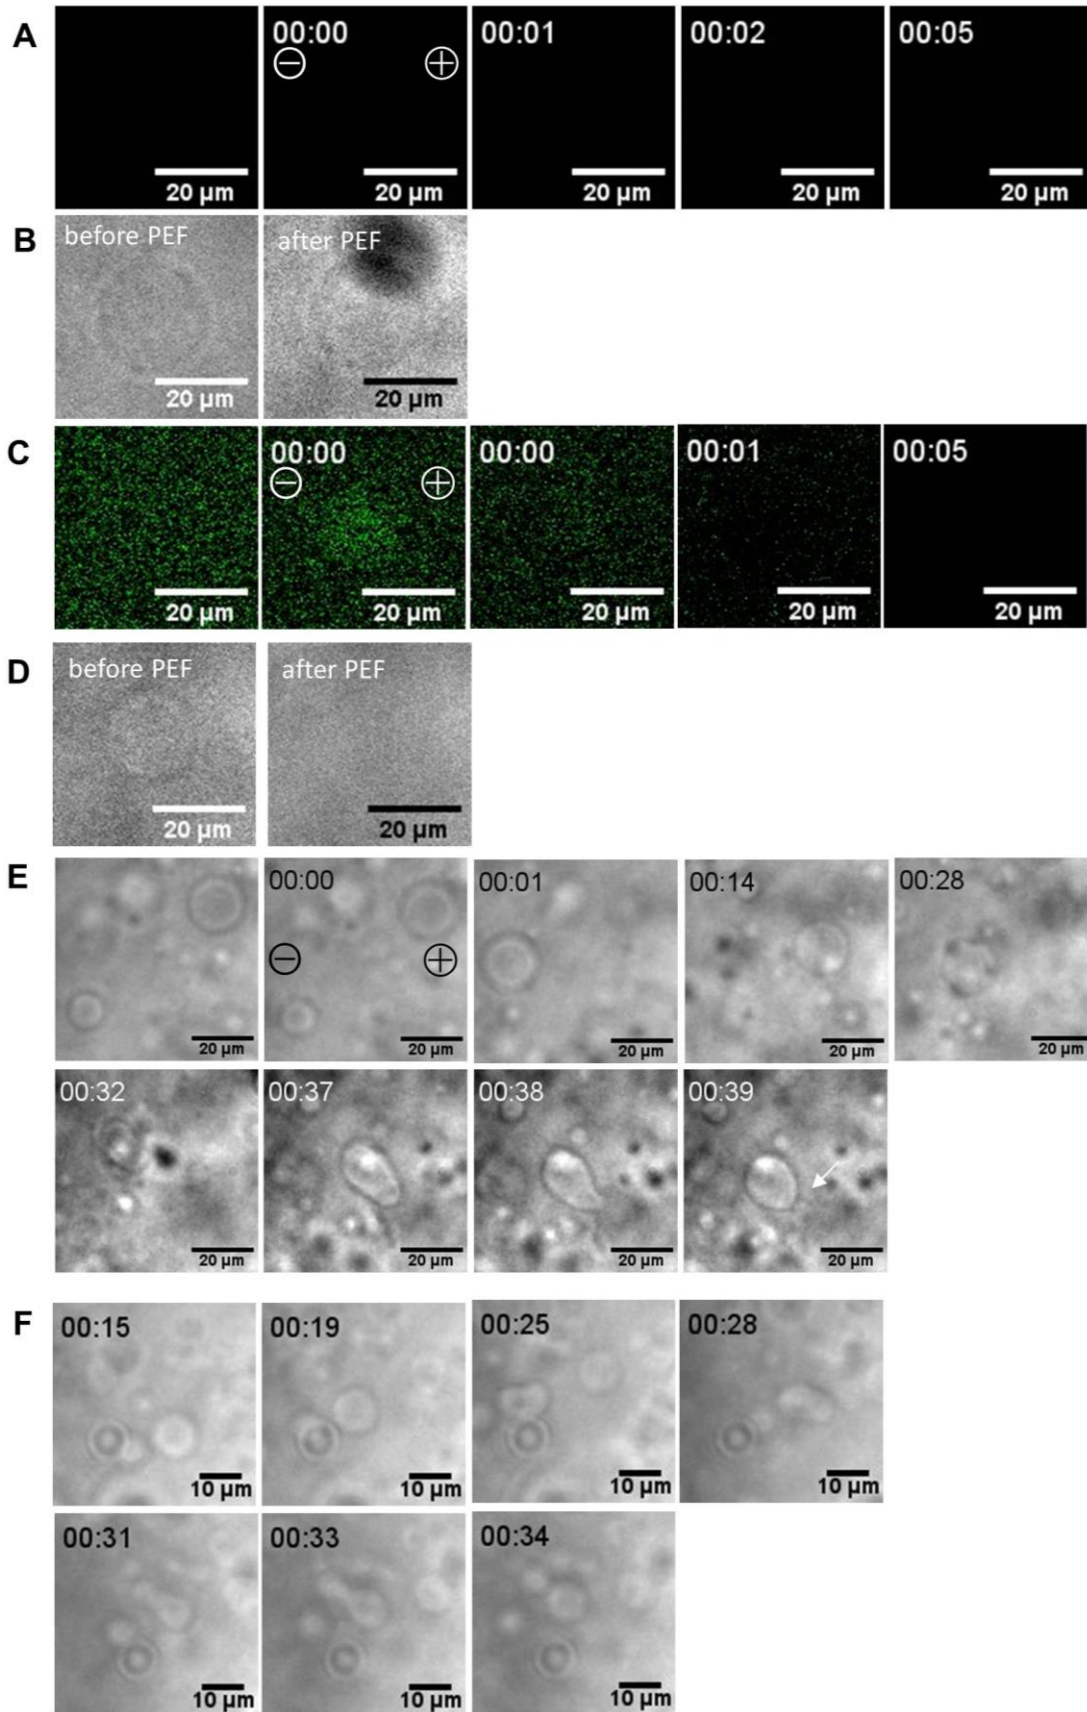



551 **Supplementary Figure 2.** A) Lecithin-only liposomes did not exhibit calcium influx  
552 under low-osmotic-pressure outer liquid. B) Lecithin-only liposomes remained after  
553 PEF exposure. C) Lecithin/cholesterol = 1:1 (molar ratio) liposomes showed Ca-ion  
554 influx just after PEF application under low-osmotic-pressure outer liquid. D)  
555 Lecithin/cholesterol = 1:1 (molar ratio) liposomes disappeared after PEF exposure. E)  
556 Lecithin/POPG = 2:1 (molar ratio) liposomes divided. White arrow indicates the  
557 daughter liposome. F) Lecithin/POPC = 2:1 (molar ratio) liposomes divided. All time  
558 displays are in seconds. “00:00” = timing of PEF application.  
559
